# Supplementary material
Source: PubMed Central journal article supplement (PMC6857704)
Supplement: NIHMS1056782-supplement-1.pdf [file NIHMS1056782-supplement-1.pdf]

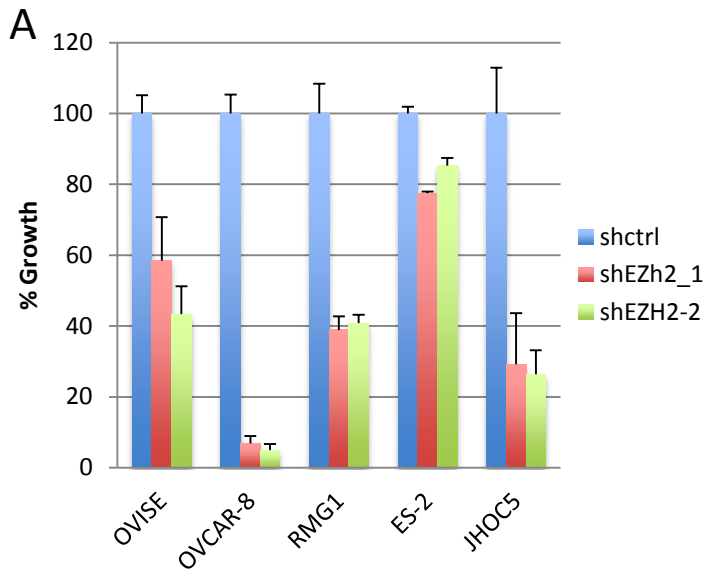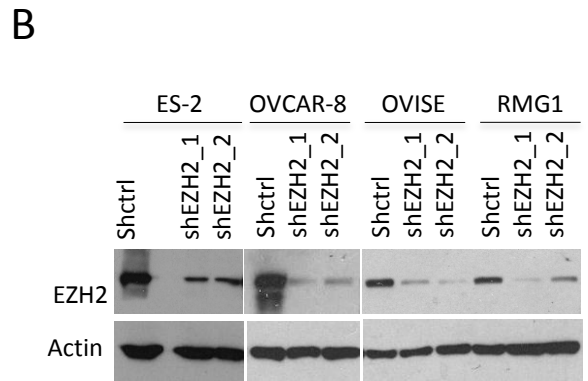

**Fig. S1 (Wang et al 2017)**

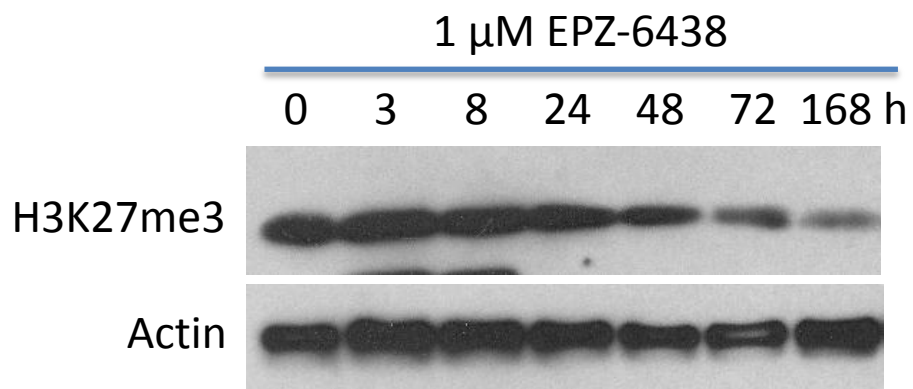

Fig. S2 (Wang et al 2017)

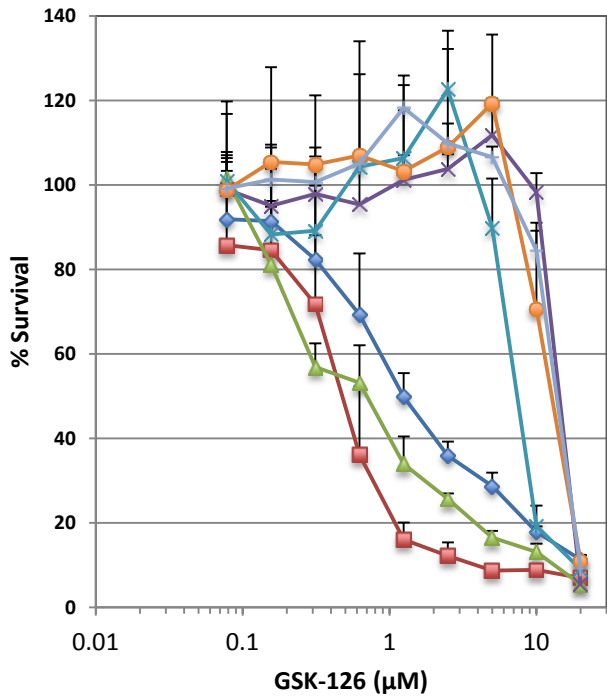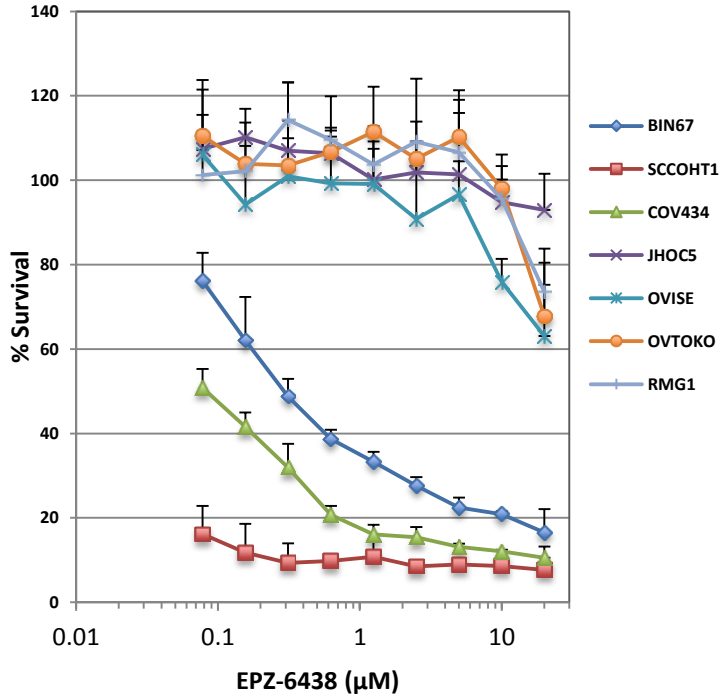

Fig. S3 (Wang et al 2017)

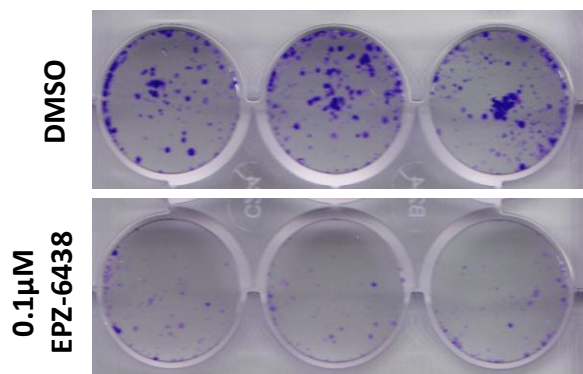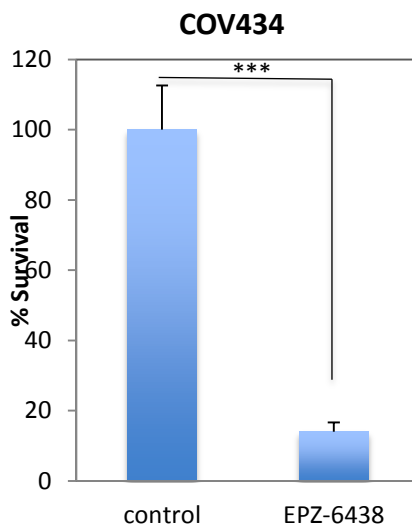

**Fig. S4 (Wang et al 2017)**

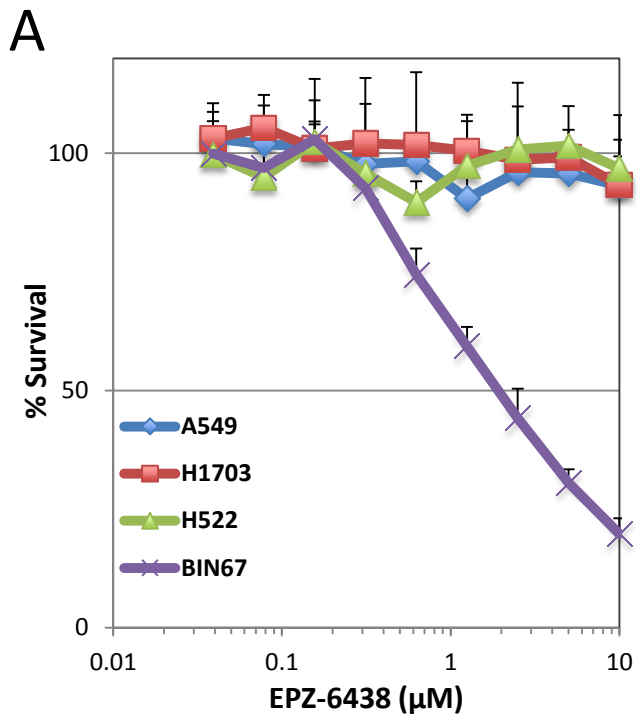

**B**

| Cell line | SMARCA4 | SMARCA2 | EPZ6438 IC50 ( $\mu\text{M}$ ) |
|-----------|---------|---------|--------------------------------|
| A549      | -       | +       | >10                            |
| H1703     | -       | -       | >10                            |
| H522      | -       | -       | >10                            |
| BIN67     | -       | -       | 2.1                            |

Fig. S5 (Wang et al 2017)

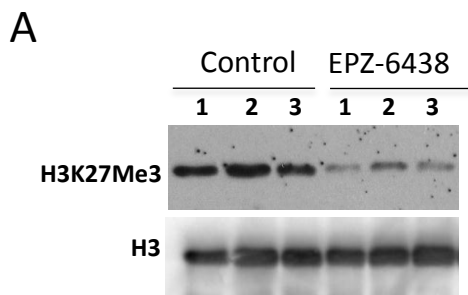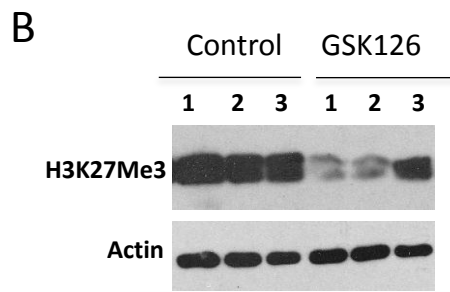

**Fig. S6 (Wang et al 2017)**

**A**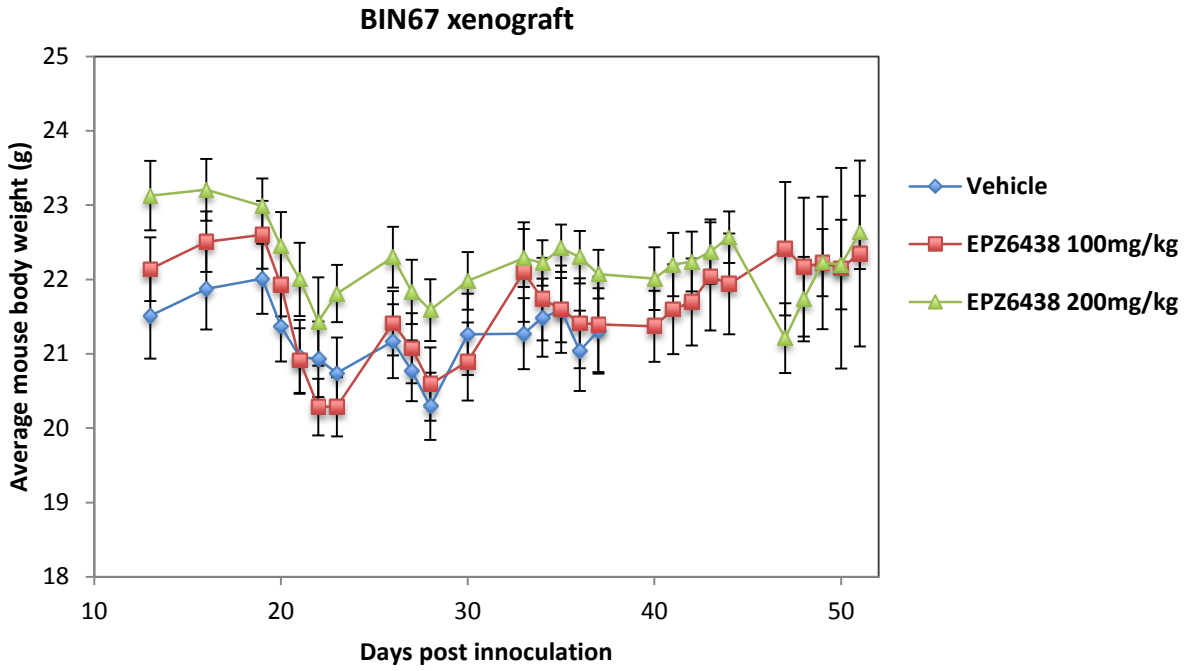**B**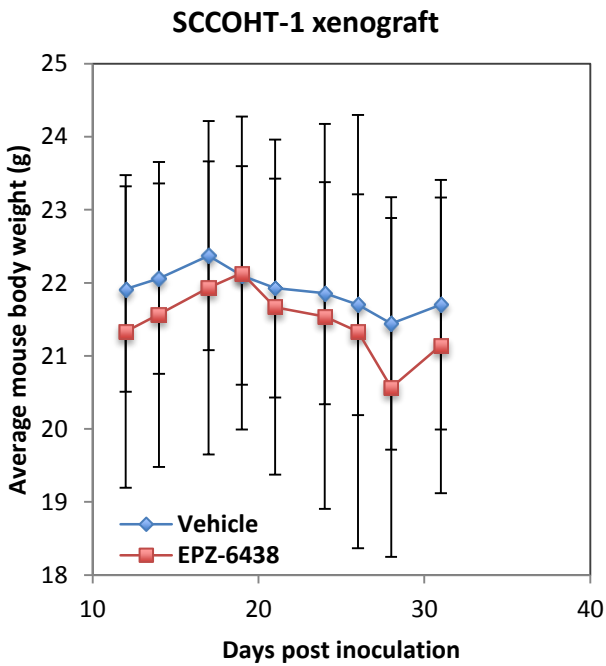**C**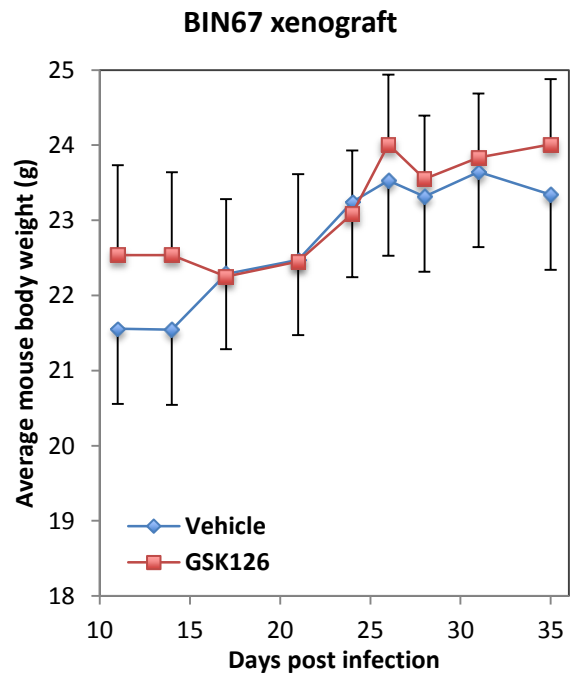**Fig. S7 (Wang et al 2017)**

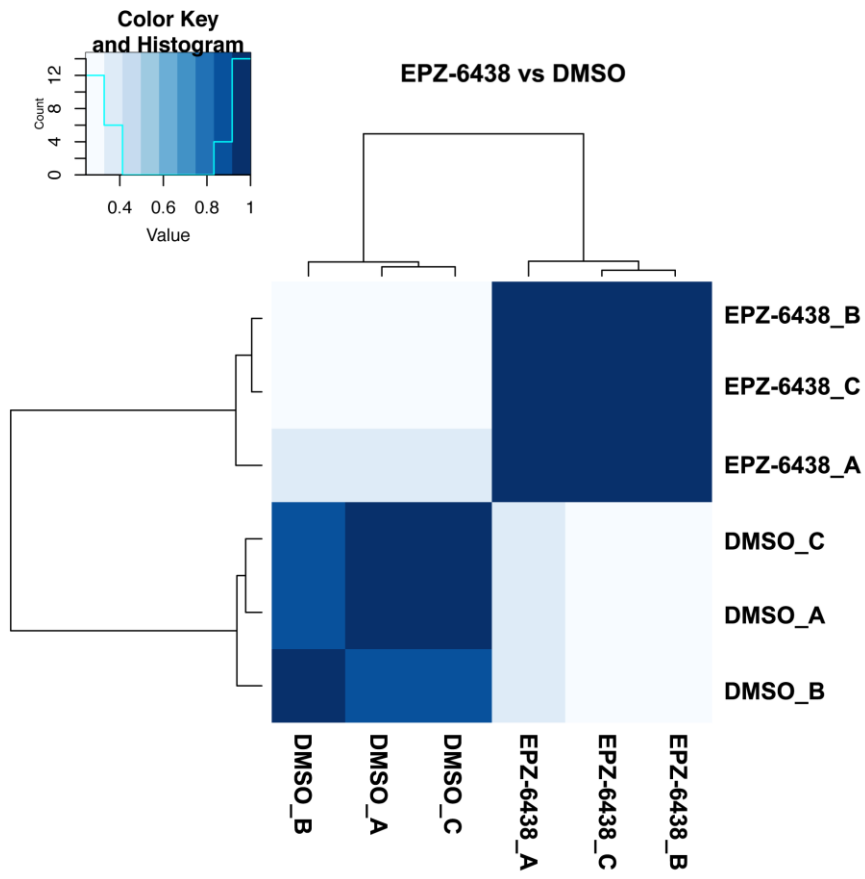

**Fig. S8 (Wang et al 2017)**



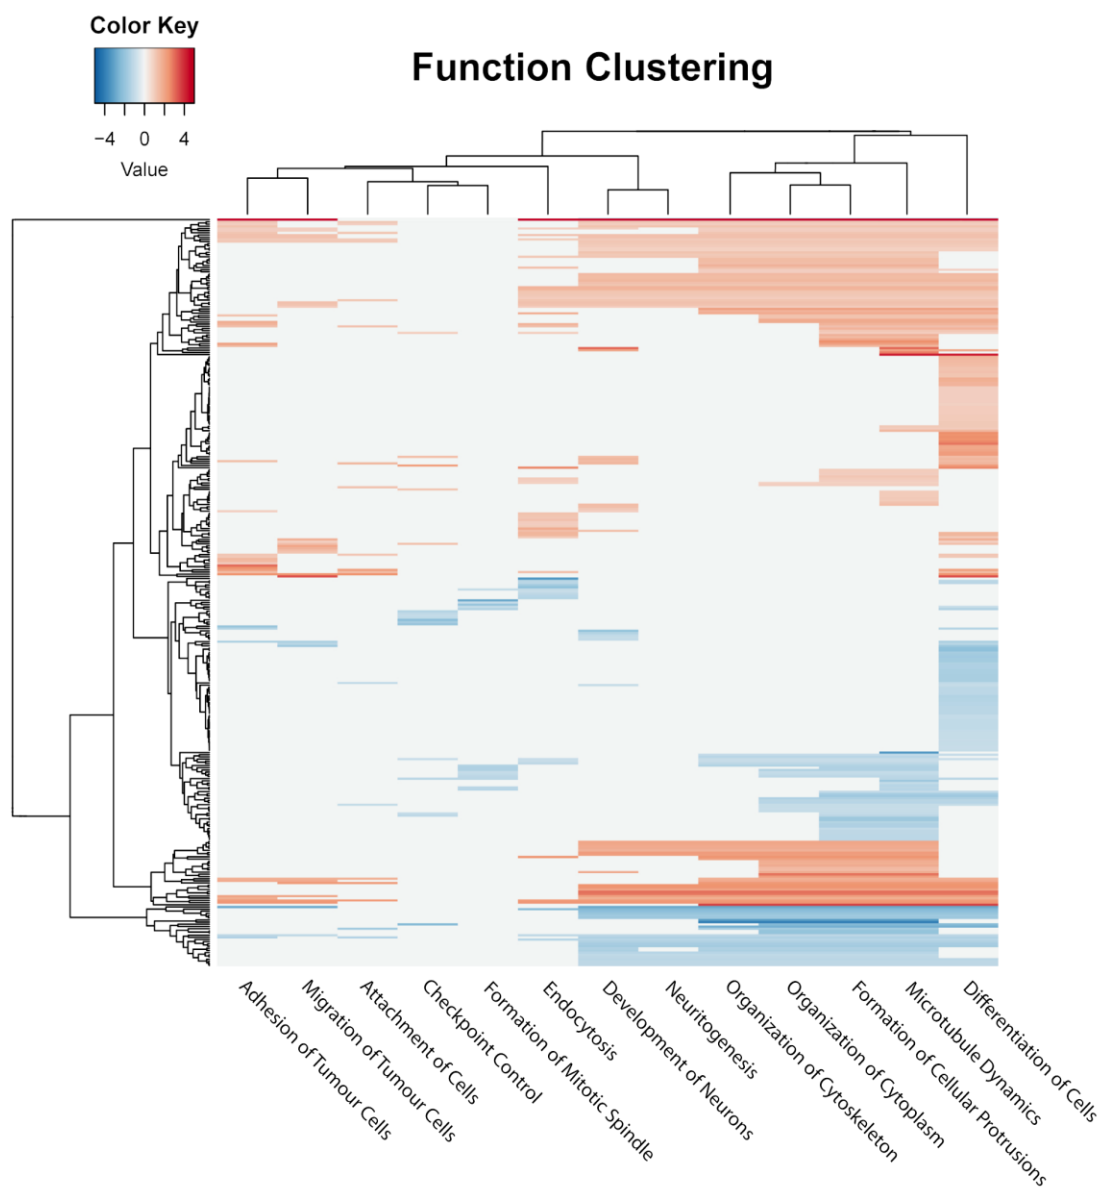

**Fig. S9 (Wang et al 2017)**

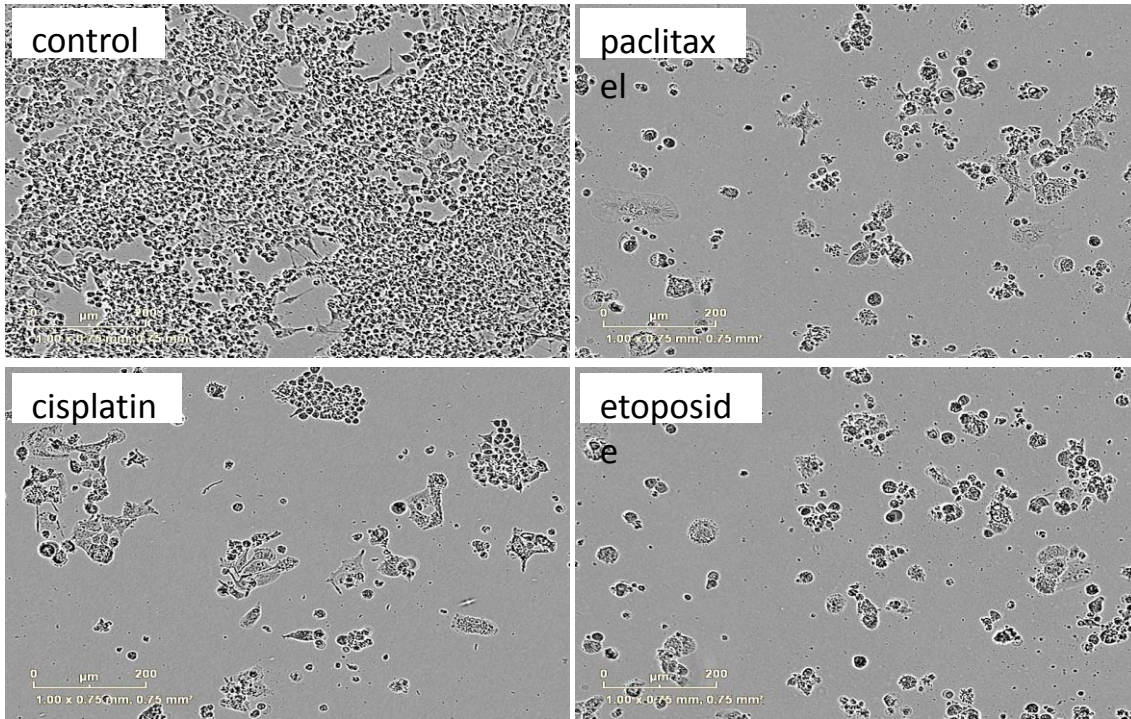

**Fig. S10 (Wang et al 2017)**
